# Supplementary material
Source: Research Square preprint supplement (doi:10.21203/rs.3.rs-9676675/v1)
Supplement: Supplementary file 1 [file 157452e6e97d2ac450a8ae63.docx]

| **Model** | **Model Rationale** | **Hyperparameters Optimized** | **Optimization Objective** |
| --- | --- | --- | --- |
| Random Forest | Non-parametric ensemble model resilient to noise and overfitting | n_estimators, max_depth, min_samples_split | Improve generalization and MCC |
| XGBoost | Boosted decision tree model with regularization and subsampling | learning_rate, max_depth, subsample, colsample_bytree | Maximize ROC-AUC and PR-AUC |
| LightGBM | Histogram-based gradient boosting for efficient large-scale learning | num_leaves, learning_rate, feature_fraction | Balance accuracy and recall |
| SVM | Margin-based classifier for nonlinear decision boundaries | C, gamma, kernel | Improve F1-score under imbalance |
| Logistic Regression | Linear, interpretable baseline classifier | C, penalty | Establish reference performance |

TABLE S1: HYPERPARAMETER SEARCH SPACE AND MODEL RATIONALE
