# Supplementary material
Source: Research Square preprint supplement (doi:10.21203/rs.3.rs-9676675/v1)
Supplement: Supplementary file 2 [file 44dd5e0144768c84ddbe47f7.docx]

Table S6: SVM-Geometric Performance by AlphaFold Confidence (pLDDT)

| pLDDT Range | N | ROC-AUC | Precision | Recall | F1-Score | Mean pLDDT |
| --- | --- | --- | --- | --- | --- | --- |
| pLDDT >75 | 68 | 0.762 | 0.821 | 0.641 | 0.72 | 79.2 |
| 60 â‰¤ pLDDT â‰¤ 75 | 78 | 0.718 | 0.763 | 0.619 | 0.682 | 68.1 |
| pLDDT <60 | 53 | 0.652 | 0.717 | 0.558 | 0.628 | 54.3 |
| Overall | 199 | 0.7228 | 0.78 | 0.62 | 0.69 | 66.1 |
