# Supplementary material
Source: Research Square preprint supplement (doi:10.21203/rs.3.rs-9676675/v1)
Supplement: Supplementary file 3 [file 472e03eb36b87e5279659cad.docx]

**Table S8. Error Analysis and Misclassification Characteristics at Median Threshold (0.5)**

| Classification Outcome | Count | Percentage | Key Characteristics |
| --- | --- | --- | --- |
| True Positive (TP) | 120 | 39.10% | High volume (290Â±80 Å²), Depth >15 Ã…, pLDDT >70 |
| True Negative (TN) | 112 | 36.50% | Low volume (120Â±70 Å²), Disorder >0.5, pLDDT <60 |
| False Positive (FP) | 39 | 12.70% | pLDDT <60, High disorder (0.6Â±0.15), Asymmetric |
| False Negative (FN) | 28 | 9.10% | Very small (<80 Å²), Shallow depth (<8 Ã…), Cryptic |
| Total | 299 | 100.00% |  |

Confusion matrix summary for the external validation cohort (N=307 predictions from 199 proteins, accounting for multiple pockets per protein). At median classification threshold (0.5), the model produces 120 true positives (39.1%), 112 true negatives (36.5%), 39 false positives (12.7%), and 28 false negatives (9.1%). False positives are predominantly low-confidence, high-disorder structures that geometrically resemble pockets but lack structural stability. False negatives primarily represent cryptic or allosteric binding sites with very small volumes (V <80 Ų), which are inherently difficult to identify in apo structures without ligand-bound reference. Error rates can be mitigated through secondary filtering or ensemble approaches (see Discussion).
