# Supplementary material
Source: Research Square preprint supplement (doi:10.21203/rs.3.rs-9676675/v1)
Supplement: Supplementary file 4 [file 53083499f1ab1425c2e38dd5.docx]

| Protein Family | N | ROC-AUC | Precision | Recall | F1-Score |
| --- | --- | --- | --- | --- | --- |
| Kinases | 72 | 0.738 | 0.795 | 0.611 | 0.694 |
| Proteases | 38 | 0.722 | 0.768 | 0.631 | 0.693 |
| Enzymes | 31 | 0.711 | 0.753 | 0.605 | 0.67 |
| GPCRs | 44 | 0.695 | 0.741 | 0.597 | 0.662 |
| Other | 14 | 0.698 | 0.729 | 0.579 | 0.646 |
| Overall | 199 | 0.723 | 0.78 | 0.62 | 0.69 |

**Table S7**: SVM-Geometric Performance by Protein Family
