# Supplementary material
Source: Research Square preprint supplement (doi:10.21203/rs.3.rs-9676675/v1)
Supplement: Supplementary file 5 [file 66956c410505c96ffa46e146.docx]

| Feature | Volume | Surface | Depth | Sphericity | Enclosure | Hydro | Polarity | Aromatic | Charge |
| --- | --- | --- | --- | --- | --- | --- | --- | --- | --- |
| Volume | 1 | 0.89 | 0.72 | 0.34 | 0.76 | 0.42 | -0.38 | 0.51 | -0.15 |
| Surface_Area | 0.89 | 1 | 0.68 | 0.28 | 0.71 | 0.38 | -0.35 | 0.47 | -0.12 |
| Depth | 0.72 | 0.68 | 1 | 0.21 | 0.64 | 0.35 | -0.32 | 0.41 | -0.18 |
| Sphericity | 0.34 | 0.28 | 0.21 | 1 | 0.29 | 0.15 | -0.12 | 0.19 | -0.08 |
| Enclosure_Score | 0.76 | 0.71 | 0.64 | 0.29 | 1 | 0.38 | -0.35 | 0.45 | -0.14 |
| Hydrophobicity | 0.42 | 0.38 | 0.35 | 0.15 | 0.38 | 1 | -0.58 | 0.72 | 0.21 |
| Polarity | -0.38 | -0.35 | -0.32 | -0.12 | -0.35 | -0.58 | 1 | -0.61 | -0.42 |
| Aromatic_Density | 0.51 | 0.47 | 0.41 | 0.19 | 0.45 | 0.72 | -0.61 | 1 | 0.18 |
| Charge_Balance | -0.15 | -0.12 | -0.18 | -0.08 | -0.14 | 0.21 | -0.42 | 0.18 | 1 |

**Table S9. Feature Correlation Matrix for Geometric and Physicochemical Descriptors**

Pearson correlation coefficients (r) between all 9 features used in the SVM-Geometric model. High-correlation pairs are identified and explained through mechanistic links. No concerning multicollinearity detected (maximum r=0.89 between mechanistically related features: Volume and Surface Area). Diagonal elements equal 1.0 (perfect self-correlation). Correlations computed on the external validation set (N=199 orphan proteins). This matrix demonstrates that the feature set contains complementary rather than redundant information, justifying the multi-descriptor approach.
