# Supplementary material
Source: Research Square preprint supplement (doi:10.21203/rs.3.rs-9676675/v1)
Supplement: Supplementary file 6 [file 6fbc01f0f2ab986f2ba1a4b3.docx]

| **Model** | **Feature Set** | **ROC-AUC (mean±std)** | **Precision (mean±std)** | **Recall (mean±std)** |
| --- | --- | --- | --- | --- |
| Random Forest | Geometric Only | 1.000±0.000 | 1.000±0.000 | 0.999±0.003 |
| Random Forest | Physicochemical Only | 0.581±0.156 | 0.618±0.142 | 0.548±0.118 |
| Random Forest | AlphaFold Only | 0.996±0.006 | 0.971±0.034 | 0.931±0.081 |
| Random Forest | Combined (All) | 1.000±0.000 | 1.000±0.000 | 1.000±0.000 |
| XGBoost | Geometric Only | 0.999±0.002 | 1.000±0.000 | 0.998±0.003 |
| XGBoost | Physicochemical Only | 0.621±0.138 | 0.642±0.118 | 0.562±0.105 |
| XGBoost | AlphaFold Only | 0.991±0.011 | 0.939±0.054 | 0.969±0.029 |
| XGBoost | Combined (All) | 1.000±0.000 | 1.000±0.000 | 1.000±0.000 |
| LightGBM | Geometric Only | 0.999±0.001 | 1.000±0.000 | 0.998±0.003 |
| LightGBM | Physicochemical Only | 0.598±0.147 | 0.634±0.139 | 0.541±0.114 |
| LightGBM | AlphaFold Only | 0.996±0.004 | 0.944±0.049 | 0.964±0.042 |
| LightGBM | Combined (All) | 0.999±0.001 | 1.000±0.000 | 1.000±0.000 |
| SVM | Geometric Only | 0.999±0.001 | 0.995±0.006 | 0.999±0.003 |
| SVM | Physicochemical Only | 0.537±0.162 | 0.619±0.174 | 0.501±0.147 |
| SVM | AlphaFold Only | 0.804±0.080 | 0.758±0.195 | 0.705±0.264 |
| SVM | Combined (All) | 0.999±0.001 | 0.995±0.006 | 0.999±0.003 |
| Logistic Regression | Geometric Only | 0.999±0.000 | 0.998±0.003 | 0.998±0.003 |
| Logistic Regression | Physicochemical Only | 0.621±0.087 | 0.612±0.089 | 0.548±0.098 |
| Logistic Regression | AlphaFold Only | 0.874±0.054 | 0.835±0.090 | 0.762±0.112 |
| Logistic Regression | Combined (All) | 0.999±0.001 | 0.998±0.004 | 0.993±0.010 |

TABLE S3: ABLATION STUDY - FEATURE SET COMPARISON
