# Supplementary material
Source: Research Square preprint supplement (doi:10.21203/rs.3.rs-9676675/v1)
Supplement: Supplementary file 7 [file bd38048581fb5331fd260328.docx]

**Table S5:** 5-Fold Cross-Validation Results (Internal Test Set, SVM-Geometric)

| Fold | ROC-AUC | Precision | Recall | F1-Score | MCC |
| --- | --- | --- | --- | --- | --- |
| 1 | 0.851 | 0.802 | 0.621 | 0.703 | 0.668 |
| 2 | 0.847 | 0.788 | 0.618 | 0.697 | 0.657 |
| 3 | 0.842 | 0.781 | 0.612 | 0.688 | 0.642 |
| 4 | 0.849 | 0.795 | 0.624 | 0.706 | 0.672 |
| 5 | 0.844 | 0.785 | 0.615 | 0.693 | 0.651 |
| Mean | 0.847 | 0.79 | 0.618 | 0.697 | 0.658 |
| SD | ±0.004 | ±0.008 | ±0.005 | ±0.007 | ±0.012 |
| CV | 0.47% | 1.01% | 0.81% | 1.00% | 1.82% |
