# Supplementary material
Source: Research Square preprint supplement (doi:10.21203/rs.3.rs-9676675/v1)
Supplement: Supplementary file 8 [file c2efd88ed9b5147380c10015.docx]

| **Rank** | **Model Name** | **Feature Set** | **ROC-AUC** |
| --- | --- | --- | --- |
| 1 | SVM_Geometric ⭐ | Geometric | 0.7228 |
| 2 | SVM_Geometric_CV | Geometric | 0.7226 |
| 3 | RandomForest_Geometric_CV | Geometric | 0.6584 |
| 4 | P2Rank (Baseline) | Traditional | 0.6620 |
| 5 | RandomForest_Geometric | Geometric | 0.5986 |
| 6 | SVM_AlphaFold | AlphaFold | 0.5762 |
| 7 | SVM_AlphaFold_CV | AlphaFold | 0.5588 |
| 8 | RandomForest_AlphaFold_CV | AlphaFold | 0.5316 |
| 9 | svm_tuned (Combined) | Combined | 0.5000 |
| 10 | RandomForest_AlphaFold | AlphaFold | 0.4451 |
| 11 | fpocket Drug Score (Baseline) | Traditional | 0.4328 |
| 12 | LogisticRegression_AlphaFold | AlphaFold | 0.4047 |
| 13 | LogisticRegression_AlphaFold_CV | AlphaFold | 0.4044 |
| 14 | RandomForest_Physicochemical_CV | Physicochemical | 0.3950 |
| 15 | LogisticRegression_Physicochemical | Physicochemical | 0.3383 |
| 16 | RandomForest_Physicochemical | Physicochemical | 0.3318 |
| 17 | logreg_tuned (Combined) | Combined | 0.2734 |
| 18 | LogisticRegression_Geometric | Geometric | 0.2698 |
| 19 | LogisticRegression_Geometric_CV | Geometric | 0.2698 |
| 20 | LogisticRegression_Physicochemical | Physicochemical | 0.2442 |
| 21 | SVM_Physicochemical | Physicochemical | 0.2304 |
| 22 | SVM_Physicochemical_CV | Physicochemical | 0.2161 |
