# Supplementary material
Source: Research Square preprint supplement (doi:10.21203/rs.3.rs-9676675/v1)
Supplement: Supplementary file 9 [file f178a78c649d77346684a685.docx]

| **TABLE S2: PERFORMANCE BEFORE VS AFTER HYPERPARAMETER OPTIMIZATION** | | | | | | | | |
| --- | --- | --- | --- | --- | --- | --- | --- | --- |
|  |  |  |  |  |  |  |  |  |
| **Model** | **Default/Tuned** | **ROC-AUC** | **PR-AUC** | **Accuracy** | **Precision** | **Recall** | **F1-Score** | **MCC** |
| Random Forest | Default | 0.987 | 0.988 | 0.982 | 0.989 | 0.975 | 0.982 | 0.963 |
| Random Forest | Tuned | 1.000 | 1.000 | 0.999 | 1.000 | 0.998 | 0.999 | 0.998 |
| XGBoost | Default | 0.992 | 0.993 | 0.987 | 0.994 | 0.981 | 0.988 | 0.974 |
| XGBoost | Tuned | 0.999 | 0.999 | 0.998 | 1.000 | 0.997 | 0.999 | 0.997 |
| LightGBM | Default | 0.989 | 0.990 | 0.984 | 0.991 | 0.978 | 0.984 | 0.968 |
| LightGBM | Tuned | 0.999 | 0.999 | 0.998 | 1.000 | 0.997 | 0.999 | 0.997 |
| SVM | Default | 0.856 | 0.874 | 0.743 | 0.801 | 0.624 | 0.703 | 0.514 |
| SVM | Tuned | 0.847 | 0.839 | 0.751 | 0.790 | 0.618 | 0.697 | 0.511 |
| Logistic Regression | Default | 0.621 | 0.642 | 0.562 | 0.571 | 0.512 | 0.540 | 0.134 |
| Logistic Regression | Tuned | 0.874 | 0.892 | 0.761 | 0.810 | 0.642 | 0.718 | 0.538 |

TABLE S2: PERFORMANCE BEFORE VS AFTER HYPERPARAMETER OPTIMIZATION
